# Supplementary material for: Serum Concentrations of Cholinesterase Inhibitors in Patients With Alzheimer’s Dementia Are Frequently Below the Recommended Levels
Source: PubMed Central journal article supplement (PMC7253642; doi:10.3389/fphar.2020.00691), 2020-05-21
Supplement: DataSheet_1.pdf [file DataSheet_1.pdf]

## 1 **Supplementary Materials**

### 3 **Methods**

#### 5 **Blood sample collection**

6 Whole blood venous samples were collected with and without anticoagulant  
7 (ethylenediaminetetraacetic acid (EDTA)). EDTA samples were immediately stored at -30  
8 degree Celsius (°C) until deoxyribonucleic acid (DNA) extraction. Serum samples were  
9 immediately stored at 4°C and centrifuged for 9 minutes at 2300 g and 4°C within 60 minutes  
10 after collection. Serum was removed and stored at -20°C. To avoid further freeze and thaw  
11 cycles serum samples were thawed once and stored in aliquots (1.5 ml reaction tubes).

#### 13 **Liquid chromatography-mass spectrometry methods**

14 The method was optimized starting from the method described by Noetzli et al. 2012 [1].  
15 Validation was carried out according to the guideline C62-A for Liquid Chromatography-  
16 Mass Spectrometry Methods [2].

17 A triple quadrupole mass spectrometer (QTRAP 5500, SCIEX, USA) with a high-  
18 performance liquid chromatography (HPLC) system (1260, G1367E; Agilent Technologies  
19 Deutschland GmbH, Germany) was used to analyze the samples in SRM mode (selected  
20 reaction monitoring mode). For the quantification of donepezil mass transition 381->91.1(Da)  
21 was selected and 383.5 -> 91.0 (Da) for IS (donepezil <sup>13</sup>C<sub>3</sub>). Transition 251.1->58.0 (Da)  
22 combined with 257.1 ->206.1 (Da) (rivastigmine D<sub>6</sub>) was used for rivastigmine quantification.  
23 For data analysis Analyst 1.6 (SCIEX Pte.Ltd, Singapore) was applied.

24 A seven point calibration curve was prepared (0.5 ng/ml to 33 ng/ml for rivastigmine and 0.5  
25 ng/ml to 66 ng/ml for donepezil) using drug free serum. In addition, three independent quality  
26 control samples with concentrations covering the calibration ranges were prepared.

27 For sample preparation 50 µl serum was mixed with 200 µl precipitation agent for 15 seconds  
28 at 1000 rpm. The precipitation agent (acetonitrile/methanol 30/70(v/v)) contained internal  
29 standards (IS): 10 ng/ml rivastigmine D<sub>6</sub> (Toronto Research Chemicals (TRC), Toronto,  
30 Ontario) and donepezil <sup>13</sup>C<sub>3</sub> 50 ng/ml (TRC, Toronto Ontario). The mixed sample was  
31 centrifuged at 1000 x g for 10 minutes. Either 10 µl or 50 µl of the supernatant were injected  
32 into the LC-MS system to analyze donepezil and rivastigmine, respectively. Chromatographic  
33 separation was carried out using a gradient on a reversed phase C<sub>18</sub> column (Onyx Monolithic  
34 C18, 100 x 3.0 mm, Phenomenex Germany, Germany) at 45°C. Mobile phase A was of H<sub>2</sub>O,  
35 mobile phase B was methanol, each buffered with 0.1 % acetic acid (v/v) and 12.5 mM  
36 ammonium acetate. All solvents were LC-MS grade. Total run time was 7 minutes.

37 Patient samples above the highest calibration concentration were diluted with drug free serum.  
38 All samples were measured at least in duplicate and mean was used for further analyses.

#### 40 **Assessment of CYP2D6 polymorphisms and gene dose assignment**

41 DNA was isolated by standard procedures from 300 µl EDTA anticoagulated blood according  
42 to the manufacturer's instructions (Wizard Genomic DNA Purification Kit, Promega). The  
43 isolated DNA of the CYP2D6 gene was immediately preamplified according to local SOPs.  
44 Considering the prevalence of CYP2D6 polymorphisms in Caucasians, the following alleles  
45 were assessed: \*1 (wildtype), \*3, \*4, \*5, \*6 (no enzyme activity), \*9, \*10, \*41 (reduced  
46 enzyme activity), and duplications of \*1 (increased enzyme activity). Genotyping for all  
47 polymorphisms of interest was performed according to methods previously described using  
48 real-time quantitative polymerase chain reaction (PCR) [3-5] on a LightCycler 2.0 (Roche,  
49 Mannheim) with LightCycler Carousel Centrifuge (Roche, Mannheim). Following previously  
50 published methods [6-8] allele specific PCR was performed using GeneAmp PCR Systems  
51 9700 (PE Applied Biosystems, Weiterstadt) for CYP2D6\*3, CYP2D6\*4, CYP2D6\*5,

1 CYP2D6\*6 and CYP2D6\*10. Supplementary table 1 shows assessed polymorphisms and  
2 used methods of assessment.  
3 Defective alleles were assigned a gene dose of 0, alleles resulting in a reduced enzyme  
4 activity were assigned a gene dose of 0.5, wild type allele \*1 a gene dose of 1, and  
5 duplications of a wild type allele a gene dose of at least 2 (supplementary table 2).  
6  
7

## 8 **References:**

- 9 1 Noetzli M, Ansermot N, Dobrinas M, Eap CB. Simultaneous determination of  
10 antimentia drugs in human plasma: procedure transfer from HPLC-MS to UPLC-  
11 MS/MS. *J Pharm Biomed Anal.* 2012;64-65:16–25. doi:10.1016/j.jpba.2012.02.008.  
12 2 Clarke W, Molinaro RJ. Liquid chromatography-mass spectrometry methods: Approved  
13 guideline. Wayne, Penn.: Clinical and Laboratory Standards Institute; 2014.  
14 3 Raimundo S, Toscano C, Klein K, Fischer J, Griese E-U, Eichelbaum M, et al. A novel  
15 intronic mutation, 2988GA, with high predictivity for impaired function of cytochrome  
16 P450 2D6 in white subjects. *Clin Pharmacol Ther.* 2004;76:128–38.  
17 doi:10.1016/j.clpt.2004.04.009.  
18 4 Müller B, Zöpf K, Bachofer J, Steimer W. Optimized strategy for rapid cytochrome P450  
19 2D6 genotyping by real-time long PCR. *Clin Chem.* 2003;49:1624–31.  
20 5 Stamer UM, Bayerer B, Wolf S, Hoefl A, Stüber F. Rapid and reliable method for  
21 cytochrome P450 2D6 genotyping. *Clin Chem.* 2002;48:1412–7.  
22 6 Ji L, Pan S, Marti-Jaun J, Hänseler E, Rentsch K, Hersberger M. Single-step assays to  
23 analyze CYP2D6 gene polymorphisms in Asians: Allele frequencies and a novel \*14B  
24 allele in mainland Chinese. *Clin Chem.* 2002;48:983–8.  
25 7 Sachse C, Brockmüller J, Bauer S, Roots I. Cytochrome P450 2D6 variants in a  
26 Caucasian population: Allele frequencies and phenotypic consequences. *Am J Hum*  
27 *Genet.* 1997;60:284–95.  
28 8 Løvlie R, Daly AK, Molven A, Idle JR, Steen VM. Ultrarapid metabolizers of  
29 debrisoquine: Characterization and PCR-based detection of alleles with duplication of the  
30 CYP2D6 gene. *FEBS Lett.* 1996;392:30–4.  
31

1 Supplementary table 1

| Semiquantitative gene dose | Mutation of alleles                                | Type of metabolizer | Number of participants | Donepezil serum concentration [ng/ml] |
|----------------------------|----------------------------------------------------|---------------------|------------------------|---------------------------------------|
| 0                          | 2 deficient alleles                                | PM                  | 2                      | 50.3 ± 7.1<br>(45.3-55.3)             |
| 0.5                        | 1 deficient allele +<br>1 reduced allele           | IM                  | 8                      | 48.0 ± 19.55<br>(27.1-87.6)           |
| 1                          | 2 reduced alleles/<br>1 deficient allele +<br>1 wt | EM                  | 16                     | 39.9 ± 14.7<br>(18.8-60.2)            |
| 1.5                        | 1 wt + 1 reduced<br>allele                         | EM                  | 4                      | 46.2 ± 23.7<br>(29.8-81.1)            |
| 2                          | 2 x wt                                             | EM                  | 10                     | 35.1 ± 10.1<br>(21.8-48.4)            |
| ≥ 3                        | duplication                                        | UM                  | 0                      | -                                     |

2 Supplementary table 1 Gene dose, allele mutations and type of metabolizer:  
 3 wt: wild type; PM: poor metabolizer; IM: intermediate metabolizer; EM: extensive  
 4 metabolizer; UM: ultra-rapid metabolizer

5

6 Supplementary table 2

| Polymorphism                 | SOP Thermocycler                  | SOP LightCycler                       |
|------------------------------|-----------------------------------|---------------------------------------|
| Deletion<br>(*5)/Duplikation | C2D6 Del-Dup-P PCR Del-Dup        | C2D6 Del-Dup LC                       |
| *3                           | C2D6 multiplex-P PCR<br>multiplex | C2D6 multiplexB-S probe<br>multiplexB |
| *4, *6                       | C2D6 multiplex-P PCR<br>multiplex | C2D6 multiplexA-S probe<br>multiplexA |
| *9                           | -                                 | C2D6 9-S probe-9                      |
| *10                          | C2D6 10-P PCR-10                  | C2D6 10-S probe-10                    |
| *41                          | -                                 | C2D6 41-S probe-41                    |

7 Legend supplementary table 2 Overview of polymorphisms and applied measuring methods:  
 8 SOP: standard operating procedure; C2D6: Cytochrome P450 isoenzyme 2D6; Del: deletion;  
 9 Dup: duplication; PCR: Polymerase Chain Reaction

10

11

12

1 Supplementary table 3

| Allele           | *1 | *3 | *4 | *5<br>(Del) | *6 | *9  | *10 | *41 | Duplication |
|------------------|----|----|----|-------------|----|-----|-----|-----|-------------|
| Single gene dose | 1  | 0  | 0  | 0           | 0  | 0.5 | 0.5 | 0.5 | >2          |

2 Legend supplementary table 3 Single alleles and corresponding gene dose:  
3 Del: deletion.

4

5

6 Supplementary table 4

7

|                                        | n= | Donepezil              | n= | Rivastigmine           | p-value |
|----------------------------------------|----|------------------------|----|------------------------|---------|
| baseline:<br>word list delayed recall  | 41 | 2.0 ± 1.8<br>(0 to 7)  | 26 | 2.4 ± 2.0<br>(0 to 7)  | 0.431   |
| Follow-up:<br>word list delayed recall | 41 | 0.4 ± 1.5<br>(-2 to 4) | 25 | 0.2 ± 1.4<br>(-2 to 3) | 0.384   |

8 Supplementary table 13: word list delayed recall at baseline and at follow-up; n: number of  
9 valid test results; where applicable: mean ± standard deviation (minimum – maximum); p-  
10 value calculated from Mann-Whitney U test

11

12

13 Supplementary table 5

| Variables                                | male<br>(n=16)           | female<br>(n=10)         | p-value            |
|------------------------------------------|--------------------------|--------------------------|--------------------|
| Serum concentration rivastigmine [ng/ml] | 6.63 ± 5.28 (1.85-17.50) | 6.39 ± 5.19 (0.47-16.90) | 1.000 <sup>b</sup> |
| Body weight [kg]                         | 74.1 ± 12.1 (50-90)      | 58.4 ± 10.7 (47-80)      | 0.004 <sup>a</sup> |
| BMI [kg/m <sup>2</sup> ]                 | 24.6 ± 2.59 (19.5-27.8)  | 21.6 ± 4.5 (16.5-30.9)   | 0.050 <sup>a</sup> |

14 Legend supplementary table 5 Sex differences *rivastigmine*: Serum concentration and BMI of  
15 male and female participants, respectively, in the *rivastigmine* group.

16 ng: nanogram; ml: milliliter; mg: milligram; kg: participants' weight in kilogram; BMI: body  
17 mass index. Where applicable: mean ± standard deviation (minimum - maximum). p-values  
18 calculated from <sup>a</sup>: t-test for normally distributed data; <sup>b</sup>: Mann-Whitney U test for not  
19 normally distributed data

20

Supplementary table 6

| Variables                                                     | Donepezil low concentration       | Donepezil high concentration                 | p-value                       | Rivastigmine low concentration   | Rivastigmine high concentration | p-value                       |
|---------------------------------------------------------------|-----------------------------------|----------------------------------------------|-------------------------------|----------------------------------|---------------------------------|-------------------------------|
| Numbers                                                       | 14                                | 14                                           |                               | 9                                | 9                               | -                             |
| Sex: male:female [n]                                          | 11 : 3<br>(79% : 21%)             | 4 : 10<br>(29% : 71%)                        | <b>0.008</b> <sup>a</sup>     | 6 : 3<br>(67% : 33%)             | 5 : 4<br>(56% : 44%)            | 0.629 <sup>a</sup>            |
| Age [years]                                                   | 69.9 ± 10.2<br>(53-88)            | 74.3 ± 9.4<br>(54-85)                        | 0.244 <sup>b</sup>            | 73.6 ± 4.6<br>(69-82)            | 70.6 ± 7.7<br>(53-78)           | 0.329 <sup>b</sup>            |
| Time baseline to follow up [days]                             | 226.7 ± 87.7<br>(96-441)          | 214.2 ± 63.9<br>(131-325)                    | 0.839 <sup>c</sup>            | 248.6 ± 99.7<br>(122-442)        | 215.7 ± 40.7<br>(164-259)       | 0.666 <sup>c</sup>            |
| Duration from start of AChE-I treatment to follow up [months] | 5.9 ± 3.3<br>(3-13)               | 5.6 ± 2.0<br>(3-10)                          | 0.839 <sup>c</sup>            | 6.0 ± 2.6<br>(4-12)              | 5.4 ± 1.7<br>(3-8)              | 0.931 <sup>c</sup>            |
| Participants taking CYP2D6 inhibitors [n]                     | 2 (14%)<br>(2x Citalopram)        | 4 (29%)<br>(3x Citalopram;<br>1x Carvedilol) | 0.357 <sup>a</sup>            | n.a.                             | n.a.                            | -                             |
| Participants taking CYP2D6 inducers [n]                       | -                                 | -                                            | -                             | n.a.                             | n.a.                            | -                             |
| Weight [kg]                                                   | 70.2 ± 9.1<br>(50-83)<br>n=13     | 68.6 ± 9.1<br>(53-83)<br>n=13                | 0.650 <sup>c</sup>            | 74.9 ± 10.8<br>(59-89)<br>n=8    | 63.6 ± 15.9<br>(47-84)          | 0.139 <sup>c</sup>            |
| BMI [kg/m <sup>2</sup> ]                                      | 22.9 ± 2.9<br>(17.2-26.2)<br>n=13 | 24.1 ± 3.7<br>(19.7-34.5)<br>n=13            | 0.650 <sup>c</sup>            | 25.7 ± 2.7<br>(22.6-30.9)<br>n=8 | 22.1 ± 4.3<br>(16.5-27.7)       | 0.074 <sup>c</sup>            |
| Gene dose                                                     | 1.3 ± 0.6<br>(0.5-2)              | 1.0 ± 0.6<br>(0-2)                           | 0.128 <sup>c</sup>            | n.a.                             | n.a.                            | -                             |
| Serum concentration [ng/ml]                                   | 26.76 ± 4.14<br>(18.75-31.45)     | 58.82 ± 11.79<br>(46.90-87.55)               | <b>&lt;0.001</b> <sup>c</sup> | 2.67 ± 1.01<br>(0.47.3.62)       | 12.50 ± 4.46<br>(0.47.3.62)     | <b>&lt;0.001</b> <sup>c</sup> |
| Variance of serum concentration                               | 17.16                             | 138.93                                       | <b>&lt;0.001</b> <sup>d</sup> | 1.01                             | 19.10                           | <b>&lt;0.001</b> <sup>d</sup> |
| Variation coefficient of serum concentration measurement      | 5.47 ± 3.01<br>(1.46-10.32)       | 5.21 ± 2.26<br>(0.77-9.09)                   | 0.910 <sup>c</sup>            | 5.88 ± 4.62<br>(2.54-17.40)      | 5.28 ± 3.82<br>(1.00-10.99)     | 0.863 <sup>c</sup>            |
| Time since last dosing [h]                                    | 21.0 ± 2.6<br>(14-25)             | 22.6 ± 1.9<br>(19-26)                        | 0.050 <sup>c</sup>            | 23.6 ± 4.1<br>(15-28)            | 24.4 ± 1.6<br>(22-27)           | 0.931 <sup>c</sup>            |
| Wordlist recall at baseline                                   | 2.3 ± 1.7<br>(0-5)                | 1.4 ± 1.6<br>(0-5)                           | 0.164 <sup>c</sup>            | 2.1 ± 2.7<br>(0-7)               | 3.1 ± 2.1<br>(0-6)              | 0.297 <sup>c</sup>            |
| Changes wordlist recall                                       | 0.1 ± 2.0<br>(-2 to 4)            | 0.4 ± 1.6<br>(-1 to 2)                       | 0.482 <sup>c</sup>            | 0 ± 1.6<br>(-2 to 2)             | 0.8 ± 1.3<br>(0-3)              | 0.161 <sup>c</sup>            |

Legend supplementary table 6 Characteristics of participants in the low and high serum concentration group for donepezil and rivastigmine: where applicable: mean  $\pm$  standard deviation (minimum - maximum); AChE-I: acetylcholinesterase inhibitor; kg: participants' weight in kilogram; BMI: body mass index in kilogram per square meter; p-values calculated from <sup>a</sup>: Chi-squared test, <sup>b</sup>: t-test or <sup>c</sup>:Mann-Whitney-U-test; <sup>d</sup>: F-test.

Supplementary table 7

| Allele              | *1    | *3    | *4    | *5<br>(Del) | *6    | *9    | *10   | *41   | Duplication<br>*1 |
|---------------------|-------|-------|-------|-------------|-------|-------|-------|-------|-------------------|
| Single<br>gene dose | 1     | 0     | 0     | 0           | 0     | 0.5   | 0.5   | 0.5   | 2                 |
| Number              | 40    | 1     | 23    | 3           | 1     | 1     | 2     | 9     | 0                 |
| Allele<br>frequency | 0.500 | 0.013 | 0.288 | 0.038       | 0.013 | 0.013 | 0.025 | 0.113 | -                 |

Legend Supplementary table 7 CYP2D6 polymorphism: Overview of tested alleles, corresponding gene dose, absolute number and frequency of alleles. Del: Deletion

Supplementary table 8

|                      | Gene<br>dose | CYP<br>2D6-<br>Inhibitors | Age   | Sex    | Duration<br>AChE-I<br>intake | Time<br>since last<br>dosing | Body<br>weight |
|----------------------|--------------|---------------------------|-------|--------|------------------------------|------------------------------|----------------|
| corr. R <sup>2</sup> | 0.047        | 0.044                     | 0.005 | 0.165  | -0.025                       | 0.054                        | -0.011         |
| Beta                 | -0.267       | 0.261                     | 0.172 | -0.432 | -0.017                       | 0.279                        | -0.132         |
| p-value              | 0.096        | 0.099                     | 0.282 | 0.005  | 0.915                        | 0.077                        | 0.435          |

Legend supplementary table 8 Prediction of serum concentration of *donepezil univariate* regression analyses: AChE-I: acetylcholinesterase inhibitor.

Supplementary table 9

|                                 | Beta   | p-value |
|---------------------------------|--------|---------|
| Type of metabolizer             | -0.314 | 0.045   |
| CYP2D6-Inhibitors               | 0.275  | 0.060   |
| Age                             | 0.180  | 0.216   |
| Sex                             | -0.734 | 0.001   |
| Duration of AChE-I<br>treatment | 0.286  | 0.058   |
| Time since last dosing          | 0.009  | 0.954   |
| Body weight                     | 0.200  | 0.269   |

Legend supplementary table 9 Prediction of serum concentration of *donepezil using type of metabolizer instead of gene dose. Multivariate* regression model. AChE-I: acetylcholinesterase inhibitor. Corr R<sup>2</sup>=0.352, p=0.005

Supplementary table 10

|                              | Beta   | p-value |
|------------------------------|--------|---------|
| Gene dose                    | -0.354 | 0.061   |
| CYP2D6-Inhibitors            | 0.240  | 0.112   |
| Age                          | 0.195  | 0.187   |
| Sex                          | -0.630 | <0.001  |
| Duration of AChE-I treatment | 0.327  | 0.035   |
| Time since last dosing       | -0.065 | 0.710   |
| BMI                          | 0.127  | 0.372   |

Legend supplementary table 10: Prediction of serum concentration of *donepezil*: *Multivariate regression model including body mass index (BMI) instead of weight*. AChE-I: acetylcholinesterase inhibitor. Corr R<sup>2</sup>=0.349, p=0.005

Supplementary table 11

|                           | Beta   | p-value |
|---------------------------|--------|---------|
| CYP2D6-Inhibitors         | 0.081  | 0.773   |
| Age                       | -0.098 | 0.684   |
| Sex                       | 0.138  | 0.635   |
| Duration AChE-I treatment | 0.096  | 0.753   |
| Time since last dosing    | 0.432  | 0.104   |
| Body weight               | -0.276 | 0.351   |

Legend supplementary table 11 Prediction of serum concentration of *rivastigmine*: *Multivariate regression model including body weight*; AChE-I: acetylcholinesterase inhibitor. Corr. R<sup>2</sup>=-0,113, p=0,718



Supplementary table 12

|                           | Beta   | p-value |
|---------------------------|--------|---------|
| CYP2D6-Inhibitors         | 0.136  | 0.625   |
| Age                       | -0.083 | 0.722   |
| Sex                       | 0.125  | 0.614   |
| Duration AChE-I treatment | 0.050  | 0.869   |
| Time since last dosing    | 0.438  | 0.087   |
| BMI                       | -0.348 | 0.186   |

Legend supplementary table 12 Prediction of serum concentration of *rivastigmine*: *Multivariate* regression model including body mass index; AChE-I: acetylcholinesterase inhibitor; BMI body mass index. Corrected R<sup>2</sup>=-0,055, p=0,583

Supplementary table 13

|                                         |         | Serum concentration | Baseline test result | Time baseline to follow-up | Sex   | Age    | model corr.R <sup>2</sup> | model p-value |
|-----------------------------------------|---------|---------------------|----------------------|----------------------------|-------|--------|---------------------------|---------------|
| Word list – delayed recall donepezil    | Beta    | 0.094               | -0.445               | -0.131                     | 0.160 | -0.156 | 0.169                     | 0.041         |
|                                         | p-value | 0.571               | 0.008                | 0.385                      | 0.342 | 0.307  |                           |               |
| Word list – delayed recall rivastigmine | Beta    | 0.472               | -0.622               | 0.281                      | 0.244 | -0.194 | 0.267                     | 0.049         |
|                                         | p-value | 0.019               | 0.006                | 0.155                      | 0.199 | 0.297  |                           |               |

Legend supplementary table 14 Correlation between cognitive changes and AChE-I serum concentration: *multivariate* regression analyses between changes in word list delayed recall and *donepezil* respectively *rivastigmine* serum concentration, baseline test result, time from baseline to follow-up, sex, and age.

Supplementary table 14

|                                         |         | Low /high serum concentration | Baseline test result | Time baseline to follow-up | Sex   | Age    | model corr.R <sup>2</sup> | model p-value |
|-----------------------------------------|---------|-------------------------------|----------------------|----------------------------|-------|--------|---------------------------|---------------|
| Word list – delayed recall donepezil    | Beta    | 0.055                         | -0.447               | -0.102                     | 0.114 | -0.171 | 0.096                     | 0.208         |
|                                         | p-value | 0.814                         | 0.044                | 0.597                      | 0.634 | 0.415  |                           |               |
| Word list – delayed recall rivastigmine | Beta    | 0.542                         | -0.711               | 0.503                      | 0.392 | -0.211 | 0.294                     | 0.098         |
|                                         | p-value | 0.035                         | 0.014                | 0.044                      | 0.110 | 0.357  |                           |               |

Legend supplementary table 15 Correlation between cognitive changes and low / high AChE-I serum concentration: *multivariate* regression analyses between changes in cognitive tests and *donepezil* respectively *rivastigmine* low / high serum concentration, baseline test result, time from baseline to follow-up, sex, and age.

## Supplementary figures

### Supplementary figure 1

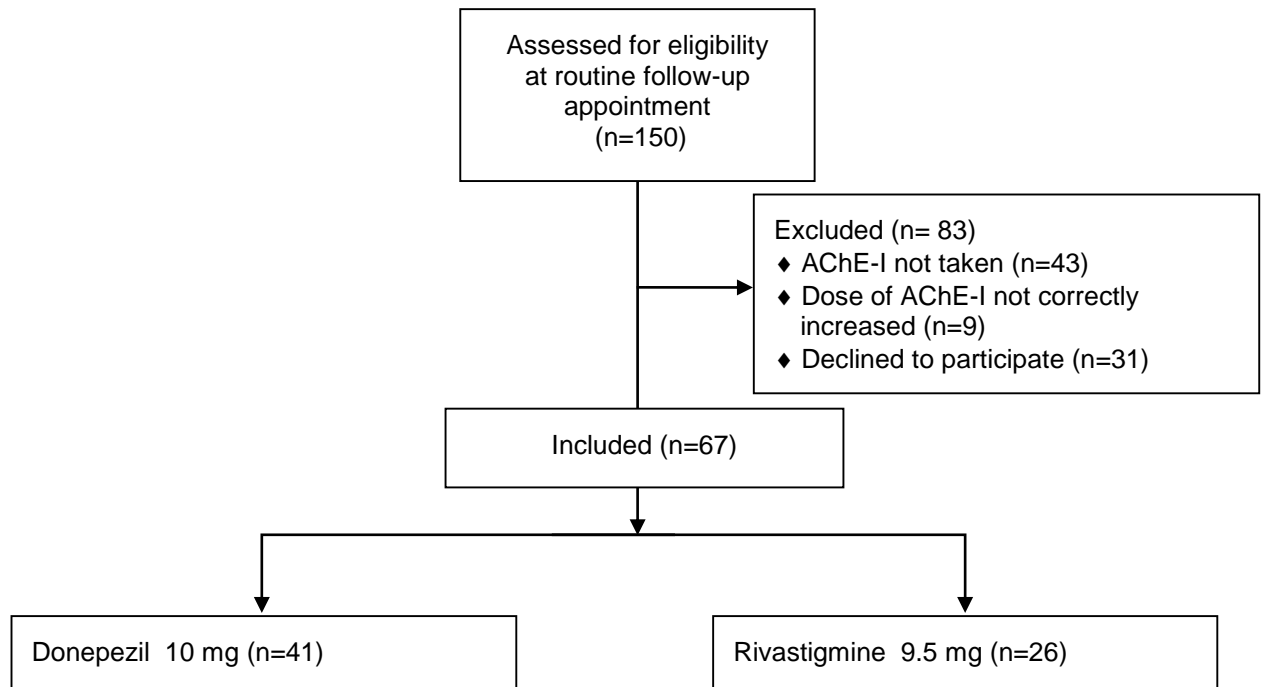

Legend to supplementary figure 1: Consort Flow Diagram depicting progress of participants  
n: number of subjects; AChE-I: acetylcholinesterase inhibitor.
